# Supplementary material for: The Potassium Transporter Hak1 in Candida Albicans, Regulation and Physiological Effects at Limiting Potassium and under Acidic Conditions
Source: MDPI journal article supplement (doi:10.3390/jof7050362), 2021-05-06
Supplement: s1 [file s1]

**Table S1. Proteins included in the Phylogenetic tree of Hak family in Fungi**

| ID sequence    | Fungi Strains                                           |
|----------------|---------------------------------------------------------|
| XP_016607719.1 | <i>Spizellomyces punctatus</i> DAOM BR117               |
| ABI37006.2     | <i>Debaryomyces hansenii</i> CBS 767                    |
| XP_718838.2    | <i>Candida albicans</i> SC5314                          |
| XP_001383251.2 | <i>Scheffersomyces stipitis</i> CBS 6054                |
| XP_001528091.1 | <i>Lodderomyces elongisporus</i>                        |
| VBB78842.1     | <i>Yarrowia lipolytica</i> <sup>a</sup>                 |
| XP_501676.1    | <i>Yarrowia lipolytica</i> <sup>b</sup>                 |
| XP_002417280.1 | <i>Candida dubliniensis</i> CD36                        |
| XP_036666213.1 | <i>Candida parapsilosis</i>                             |
| EDK41390.2     | <i>Meyerozyma guilliermondii</i>                        |
| OVF10943.1     | <i>Clavispora lusitaniae</i>                            |
| XP_002549931.1 | <i>Candida tropicalis</i> MYA-3404                      |
| XP_003866449.1 | <i>Candida orthopsilosis</i> Co 90-125                  |
| AAB17122.2     | <i>Schwanniomyces occidentalis</i>                      |
| CCE34941.1     | <i>Ogataea angusta</i>                                  |
| XP_007007047.1 | <i>Tremella mesenterica</i> DSM 1558                    |
| XP_001876329.1 | <i>Laccaria bicolor</i> S238N-H82                       |
| XP_003032151.1 | <i>Schizophyllum commune</i> H4-8                       |
| XP_007407239.1 | <i>Melampsora larici-populina</i> 98AG31                |
| KAF9808492.1   | <i>Postia placenta</i> MAD-698-R-SB12                   |
| XP_003325997.2 | <i>Puccinia graminis f. sp. tritici</i> CRL 75-36-700-3 |
| KAG5294344.1   | <i>Histoplasma capsulatum</i> G217B                     |
| EEQ88319.2     | <i>Blastomyces dermatitidis</i> ER-3                    |
| XP_001247463.2 | <i>Coccidioides immitis</i> RS                          |
| XP_003169811.1 | <i>Nannizzia gypsea</i> CBS 118893                      |

|                |                                                    |
|----------------|----------------------------------------------------|
| EGE03791.1     | <i>Trichophyton equinum</i> CBS 127.97             |
| SMY29655.1     | <i>Zymoseptoria tritici</i> ST99CH_1A5             |
| XP_001273808.1 | <i>Aspergillus clavatus</i> NRRL 1                 |
| XP_001399699.2 | <i>Aspergillus niger</i> CBS 513.88                |
| XP_014080355.1 | <i>Bipolaris maydis</i> ATCC 48331                 |
| XP_001804449.1 | <i>Parastagonospora nodorum</i> SN15               |
| XP_964946.1    | <i>Neurospora crassa</i> OR74A                     |
| XP_040773768.1 | <i>Cryphonectria parasitica</i> EP155 <sup>a</sup> |
| KAF3770430.1   | <i>Cryphonectria parasitica</i> EP155 <sup>b</sup> |
| ELQ63511.1     | <i>Pyricularia oryzae</i> 70-15                    |
| XP_009655039.1 | <i>Verticillium dahliae</i> VdLs.17                |
| XP_018242043.1 | <i>Fusarium oxysporum</i>                          |
| XP_001554184.2 | <i>Botrytis cinerea</i> B05.10                     |
| XP_001591952.1 | <i>Sclerotinia sclerotiorum</i> 1980 UF-70         |
| KAF9784960.1   | <i>Thelephora terrestris</i>                       |

<sup>a, b</sup> refer to different Haks in the same species
